1 **Variation in pigmentation gene expression is associated with distinct aposematic color morphs in the poison frog,**

2 ***Dendrobates auratus***

3

4 Adam M. M. Stuckert<sup>\*1,2,3</sup>, Emily Moore<sup>4</sup>, Kaitlin P. Coyle<sup>4</sup>, Ian Davison<sup>1</sup>, Matthew D. MacManes<sup>2,3</sup>, Reade Roberts<sup>4</sup>,

5 Kyle Summers<sup>1</sup>

6

7 <sup>1</sup>Department of Biology, East Carolina University

8 <sup>2</sup>Hubbard Center for Genome Studies, University of New Hampshire

9 <sup>3</sup>Department of Molecular, Cellular & Biomedical Sciences, University of New Hampshire

10 <sup>4</sup>Department of Biological Sciences, North Carolina State University

11

12

13 **Abstract:**

14 Color and pattern phenotypes have clear implications for survival and reproduction in many species.  
15 However, the mechanisms that produce this coloration are still poorly characterized, especially at the genomic level.  
16 Here we have taken a transcriptomics-based approach to elucidate the underlying genetic mechanisms affecting  
17 color and pattern in a highly polytypic poison frog. We sequenced RNA from the skin from four different color  
18 morphs during the final stage of metamorphosis and assembled a *de novo* transcriptome. We then investigated  
19 differential gene expression, with an emphasis on examining candidate color genes from other taxa. Overall, we  
20 found differential expression of a suite of genes that control melanogenesis, melanocyte differentiation, and  
21 melanocyte proliferation (e.g., *tyrp1*, *lef1*, *leo1*, and *mitf*) as well as several differentially expressed genes involved in  
22 purine synthesis and iridophore development (e.g., *arfgap1*, *arfgap2*, *airc*, and *gairt*). Our results provide evidence  
23 that several gene networks known to affect color and pattern in vertebrates play a role in color and pattern variation  
24 in this species of poison frog.

25

26 **Introduction:**

27           Color and pattern phenotypes have long been of interest to both naturalists and evolutionary biologists  
28 (Bates 1862; Müller 1879). Part of this interest derives from the association of this phenome with selective pressures  
29 like mate choice (Kokko et al. 2002) and predation (Ruxton et al. 2004). Species with morphological phenotypes  
30 directly tied to survival and reproduction provide excellent opportunities to study the genetic underpinnings of color  
31 and pattern, precisely because these phenotypes are so obviously linked to survival.

32           Aposematic species rely on color and pattern to warn predators, but in many cases these color and pattern  
33 phenotypes are extremely variable, often changing over short geographic distances or even exhibiting polymorphism  
34 within populations (Brown et al. 2011; Merrill et al. 2015). Theory has long predicted that aposematic species should  
35 be monomorphic because predators learn a common signal, and thus aposematic individuals with a different  
36 phenotype should be selected against (Müller 1879; Mallet and Joron 1999). While predator variation and drift alone  
37 may be sufficient to create phenotypic variation, a variety of alternative selective pressures can act on the  
38 aposematic signal to produce and maintain this variety (reviewed in Briolat et al. 2018).

39           Research on the production of color and pattern early in life in polytypic species (those that vary in discrete  
40 phenotypes over geographical space) has been limited, especially in vertebrates. Differences in color and pattern in  
41 some highly variable aposematic species seem to be determined by a small number of loci (Martin et al. 2012; Supple  
42 et al. 2013; Kunte et al. 2014; Vestergaard et al. 2015). However, the majority of the research on the underlying  
43 genetic architecture associated with varied color and patterns in aposematic species has been done in the  
44 Neotropical butterflies of the genus *Heliconius*. While this work has been highly informative, it remains unclear  
45 whether these trends are generally applicable to other systems, including in vertebrates.

46           Many of the Neotropical poison frogs (family Dendrobatidae) exhibit substantial polytypism throughout their  
47 range (Summers et al. 2003; Brown et al. 2011). Despite being one of the better characterized groups of aposematic  
48 species, our knowledge of the mechanisms of color production in this family is quite limited. In addition, there is little  
49 information on the genetics of color pattern in amphibians generally. While modern genomic approaches, especially  
50 high-throughput sequencing, have recently provided extensive insights into the genes underlying color pattern  
51 variation in fish (Diepeveen and Salzburger 2011; Ahi and Sefc 2017), reptiles (Saenko et al. 2013), birds (Ekblom et  
52 al. 2012) and mammals (Gene et al. 2001; Bennett and Lamoreux 2003; Bauer et al. 2009), there have been few

53 genomic studies of the genetic basis of color patterns in amphibians. This is in part because amphibian genomes are  
54 often large and repetitive. For example the strawberry poison frog (*Oophaga pumilio*) has a large genome (6.7 Gb)  
55 which is over two-thirds repeat elements (Rogers et al. 2018). The dearth of amphibian data is an important gap in  
56 our knowledge of the genomics of color and pattern evolution, and the genetic and biochemical pathways underlying  
57 color pattern variation across vertebrates.

58 Amphibians exhibit quite varied colors and patterns, and these are linked to the three structural  
59 chromatophore types (melanophores, iridophores, and xanthophores) and the pigments and structural elements  
60 found within them (e.g. melanins, pteridines and guanine platelets; Mills & Patterson 2009). Melanophores and the  
61 melanin pigments they contain are responsible for producing dark coloration, particularly browns and blacks, and are  
62 also critical to the production of darker green coloration (Duellman and Trueb 1986). Blue and green coloration in  
63 amphibians is generally produced by reflectance from structural elements in iridophores (Bagnara et al. 2007).  
64 Iridophores contain guanine crystals arranged into platelets that reflect particular wavelengths of light, depending on  
65 platelet size, shape, orientation and distribution (Ziegler 2003; Bagnara et al. 2007; Saenko et al. 2013). Generally  
66 speaking, thicker and more dispersed platelets reflect longer wavelengths of light (Saenko et al. 2013). Combinations  
67 of iridophores and xanthophores or erythropores containing carotenoids or pteridines (respectively) can produce a  
68 wide diversity of colors (Saenko et al. 2013). Xanthophores are thought to be largely responsible for the production  
69 yellows, oranges, and reds in amphibians. The precise coloration exhibited is linked to the presence of various  
70 pigments such as pteridines and carotenoids that absorb different wavelengths of light (Duellman and Trueb 1986).

71 In order to better understand the genetic mechanisms affecting the development of color and pattern, we  
72 examined four different captive bred color morphs of the green-and-black poison frog (*Dendrobates auratus*). We  
73 used an RNA sequencing approach to examine gene expression and characterize the skin transcriptome of this  
74 species. In addition to assembling a *de novo* skin transcriptome of a species from a group with few genomic  
75 resources, we compared differential gene expression between color morphs. We focused on differential gene  
76 expression in a set of *a priori* candidate genes that are known to affect color and pattern in a variety of different taxa.  
77 Finally, we examined gene ontology and gene overrepresentation of our dataset. These data will provide useful

78 genomic and candidate gene resources to the community, as well as a starting point for other genomic studies in  
79 both amphibians and other aposematic species.

80

## 81 **Methods:**

### 82 *Color morphs:*

83 Captive bred *Dendrobates auratus* were obtained from Understory Enterprises, LLC. Four distinct morphs were used  
84 in this study; the San Felix and super blue morphs both have a brown dorsum, with the former having green spotting,  
85 and the latter typically having light blue markings (often circular in shape), sporadically distributed across the  
86 dorsum. The microspot morph has a greenish-blue dorsum with small brownish-black splotches across the dorsum.  
87 Finally, the blue-black morph has a dark black dorsum with blue markings scattered across the dorsum that are  
88 typically long and almost linear. Photographs of frogs from these morphs in captivity are found in Figure 1. We note  
89 that the breeding stock of these different morphs, while originally derived from different populations in Central  
90 America, have been bred in captivity for many generations. As a result, it is possible that color pattern differences  
91 between these morphs in captivity may exceed those generally found in the original populations. Nevertheless, the  
92 differences between these morphs are well within the range of variation in this highly variable, polytypic species  
93 which ranges from Eastern Panama to Nicaragua.

94

### 95 *Sample collection:*

96 Frogs were maintained in pairs in 10 gallon tanks with coconut shell hides and petri dishes were placed under  
97 the coconut hides to provide a location for females to oviposit. Egg clutches were pulled just prior to hatching and  
98 tadpoles were raised individually in ~100 mL of water. Tadpoles were fed fish flakes three times a week, and their  
99 water was changed twice a week. Froglets were sacrificed during the final stages of aquatic life (Gosner stages 41-43;  
100 Gosner 1960). At this point, froglets had both hind limbs and at least one forelimb exposed. These froglets had color  
101 and pattern elements at this time, but pattern differentiation and color production is still actively occurring during  
102 metamorphosis and afterwards. After euthanasia, whole specimens (n = 3 per morph) were placed in RNAlater

103 (Qiagen) for 24 hours, prior to storage in liquid nitrogen. We then did a dorsal bisection of each frog's skin, and  
104 prepared half of the skin for RNA extraction.

105

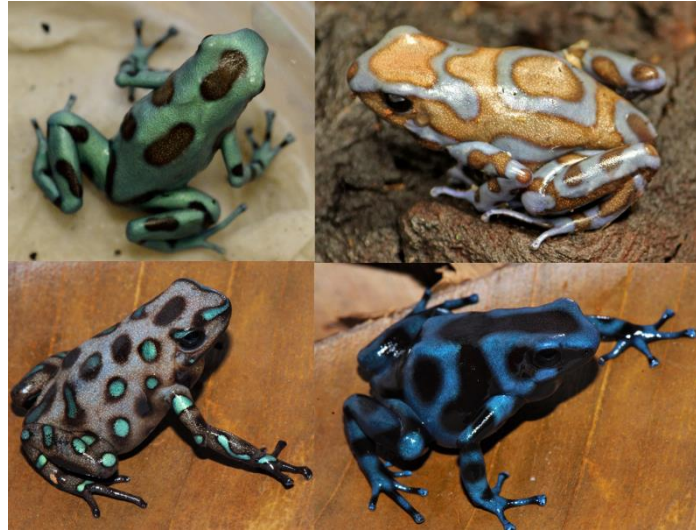

106

107 *Figure 1.* Normative depictions of the four captive morphs used in this study. Color morphs clockwise from top left:  
108 microspot, super blue, blue and black, San Felix. Microspot and super blue photographs courtesy of ID, blue-black  
109 and San Felix photos were provided by Mark Pepper at Understory Enterprises, LLC.

110

111 RNA was extracted from each bisected dorsal skin sample using a hybrid Trizol (Ambion) and RNeasy spin  
112 column (Qiagen) method and total RNA quality was assayed using the Bioanalyzer 2100 (Agilent). Messenger RNA  
113 (mRNA) was isolated from total RNA with Dynabeads Oligo(dT)<sub>25</sub> (Ambion) for use in the preparation of uniquely-  
114 barcoded, strand-specific directional sequencing libraries with a 500bp insert size (NEBNext Ultra Directional RNA  
115 Library Prep Kit for Illumina, New England Biosystems). Libraries were placed into a single multiplexed pool for 300  
116 bp, paired end sequencing on the Illumina MiSeq. Each sample had a total of 2-5.8 million reads.

117

118 *Transcriptome assembly:*

119 We randomly chose one individual per morph type and assembled this individual's transcriptome. First, we  
120 aggressively removed adaptors and did a gentle quality trimming using trimmomatic version 0.36 (Bolger et al. 2014).  
121 We then implemented read error correction using RCorrector version 1.01 (Song and Florea 2015) and assembled the  
122 transcriptome using the Oyster River Protocol version 1.1.1 (MacManes 2018). The Oyster River Protocol (MacManes  
123 2018) assembles a transcriptome with a series of different transcriptome assemblers and kmer lengths, ultimately  
124 merging them into a single transcriptome. Transcriptomes were assembled using Trinity version 2.4.0 (Haas et al.  
125 2014), two independent runs of SPAdes assembler version 3.11 with kmer lengths of 55 and 75 (Bankevich et al.  
126 2012), and lastly Shannon version 0.0.2 with a kmer length of 75 (Kannan et al. 2016). The four transcriptomes were  
127 then merged together using OrthoFuser (MacManes 2018). Transcriptome quality was assessed using BUSCO version  
128 3.0.1 against the eukaryote database (Simão et al. 2015) and TransRate 1.0.3 (Smith-Unna et al. 2016). BUSCO  
129 evaluates the genic content of the assembly by comparing the transcriptome to a database of highly conserved  
130 genes. Transrate contig scores evaluate the structural integrity of the assembly, and provide measures of accurate,  
131 completeness, and redundancy. We then compared the assembled, merged transcriptome to the full dataset (every  
132 read in our dataset concatenated together) by using BUSCO and TransRate.

133

#### 134 *Downstream analyses:*

135 We annotated our transcriptome using the peptide databases corresponding to frog genomes for *Xenopus*  
136 *tropicalis* (NCBI Resource Coordinators 2016), *Nanorana parkeri* (Sun et al. 2015), and *Rana catesbeiana* (Hammond  
137 et al. 2017) as well as the UniRef90 database (Bateman et al. 2017) using Diamond version 0.9.10 (Buchfink et al.  
138 2015) and an e-value cutoff of 0.001. We then pseudo-aligned reads from each sample using Kallisto version 0.43.0  
139 (Bray et al. 2016) and examined differential expression of transcripts in R version 3.4.2 (R Core Team 2017) using  
140 Sleuth version 0.29.0 (Pimentel et al. 2017). Differential expression was analyzed by performing a likelihood ratio test  
141 comparing a model with color morph as a factor to a simplified, null model of the overall data, essentially testing for  
142 differences in expression patterns between any of the four morphs. In addition to examining overall differential  
143 expression between morphs, we examined differential expression in an *a priori* group of candidate color genes (see

144 supplemental table 1). We used PANTHER (Mi et al. 2017) to quantify the distribution of differentially expressed  
145 genes annotated to *Xenopus tropicalis* into biological processes, molecular functions, and cellular components.

146

147 *Data and analyses availability:*

148 All read data are archived with the European Nucleotide Archive project PRJEB25664 (embargoed until paper  
149 acceptance). Code for transcriptome assembly, annotation, and downstream analyses are all available on GitHub  
150 ([https://github.com/AdamStuckert/Dendrobates\\_auratus\\_transcriptome](https://github.com/AdamStuckert/Dendrobates_auratus_transcriptome)). Further, our candidate color genes are  
151 available in Supplementary Table 1, and for the purposes of review, our assembled transcriptome is publicly available  
152 (Stuckert 2018; <http://doi.org/10.5281/zenodo.1443579>).

153

154 **Results:**

155 *Transcriptome assembly:*

156 After conducting the Oyster River Protocol for one random individual per color morph and merging them  
157 together, we were left with a large transcriptome containing 597,697 transcripts. We examined the BUSCO and  
158 transrate scores for each morph's transcriptome, as well as for the transcriptome created by orthomerging these four  
159 assemblies (Table 1). BUSCO and transrate scores were computed using the full, cleaned read dataset from all  
160 samples. Given the poor transrate score of our final, merged assembly we selected and used the good contigs from  
161 transrate (i.e., those that are accurate, complete, and non-redundant), which had a minimal effect on our overall  
162 BUSCO score. In total, our assembly from the good contigs represents 160,613 individual transcripts (the "full  
163 assembly" in Table 1). Overall, our annotation to the combined *Xenopus*, *Nanorana*, *Rana*, and UniRef90 peptide  
164 databases yielded 76,432 annotated transcripts (47.5% of our transcriptome).

165

|               | Transrate score | Transrate optimal score | BUSCO score |
|---------------|-----------------|-------------------------|-------------|
| Blue-black    | 0.05446         | 0.40487                 | 96.3%       |
| Microspot     | 0.04833         | 0.35907                 | 94.0%       |
| San Felix     | 0.0556          | 0.35718                 | 88.1%       |
| Super blue    | 0.0521          | 0.38094                 | 96.0%       |
| Full assembly | 0.01701         | 0.13712                 | 95.8%       |

166 Table 1. Assembly metrics for each of our assembled transcriptomes. Metrics for the full assembly were calculated  
167 using the full, cleaned dataset. BUSCO scores represent the percentage of completion (i.e., 100% is an entirely  
168 complete transcriptome).

169

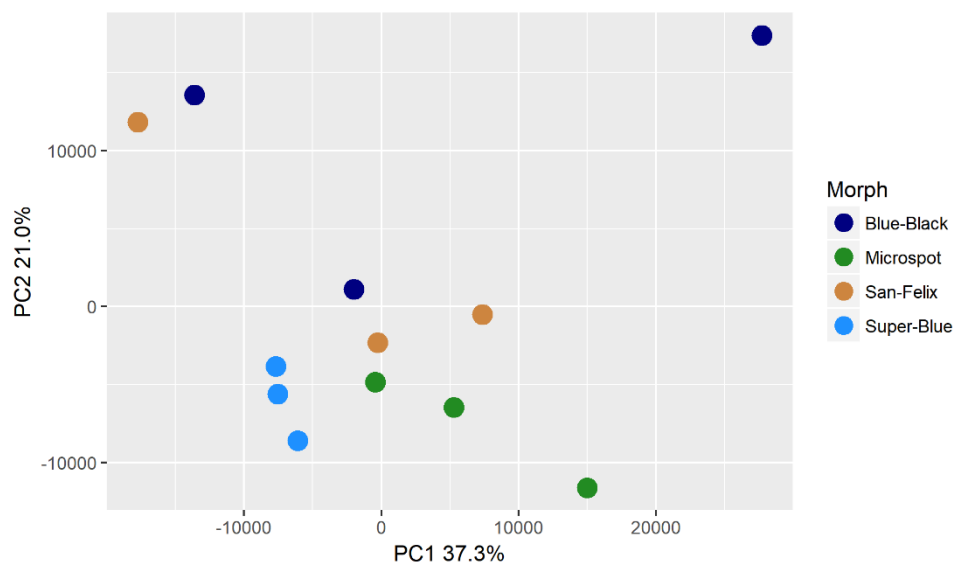

170

171 Figure 2. Principal component analysis indicating general within-morph similarity in transcript abundance within our  
172 dataset. PCA computation was normalized as transcripts per million. Each dot indicates one individual and the  
173 percentage of variation explained by the axes are presented.

174

175 *Differential expression and pathways:*



176 Our results indicate that there are distinct differences in expression between color morphs (Figure 2).  
 177 Principal component 1 (37.3% of variation explained) and principal component 2 (21.0% of variation explained).  
 178 When we tested for differential expression we found a total of 2,845 differentially expressed transcripts among color  
 179 morphs (1.77% of our transcriptome; Supplementary Table 2). From our list of candidate color genes, we found 58  
 180 differentially expressed transcripts (q value < 0.05) associated with 41 candidate color genes in total (see Table 2 and  
 181 Figures 6 and 7). Many of these genes are involved in typical vertebrate pigmentation pathways, which we highlight  
 182 in Figure 8. In our analyses of gene function using all differentially expressed genes in PANTHER, we found that most  
 183 of these genes were associated with either metabolic or cellular processes (Figure 3). Similarly, most of these genes  
 184 contributed to either cell part or organelle cellular components (Figure 4). The molecular function was heavily  
 185 skewed towards catalytic activity and binding, both of which are likely a result of the huge developmental  
 186 reorganization involved in metamorphosis (Figure 5).

| Gene symbol | q value                                      | Pathway                                                   | Citation                                           |
|-------------|----------------------------------------------|-----------------------------------------------------------|----------------------------------------------------|
| adam17 (2)  | 0.0163;<br>0.0469                            | Melanocyte development                                    | Bennett and Lamoreux 2003                          |
| arfgap1 (2) | 0.00362;<br>0.0267                           | Putative guanine synthesis in iridophores                 | Higdon et al. 2013                                 |
| arfgap3 (4) | 0.00739;<br>0.0000123;<br>0.00132;<br>0.0282 | Putative guanine synthesis in iridophores                 | Higdon et al. 2013                                 |
| airc        | 0.0126                                       | Guanine synthesis                                         | Tolstorukov and Efremov 1984; Sychrova et al. 1999 |
| atic        | 0.0447                                       | Guanine synthesis in iridophores                          | Higdon et al. 2013                                 |
| atox1       | 0.00124                                      | Melanogenesis                                             | Hung et al. 1998; Klomp et al. 1997                |
| atp12a      | 0.0296                                       | Melanogenesis                                             | Nelson et al. 2009                                 |
| bbs2        | 0.0300                                       | Melanosome transport                                      | Tayeh et al. 2008                                  |
| bbs5        | 0.0447                                       | Melanosome transport                                      | Tayeh et al. 2008                                  |
| bmpr1b      | 0.0118                                       | Inhibits melanogenesis                                    | Yaar et al. 2006                                   |
| brca1       | 0.0455                                       | Alters pigmentation, produces piebald appearances in mice | Ludwig et al. 2001; Tonks et al. 2012              |
| ctr9        | 0.0280                                       | Melanocyte assembly                                       | Akanuma et al. 2007; Nguyen et al. 2010            |
| dera        |                                              | Guanine synthesis in iridophores                          | Higdon et al. 2013                                 |

|            |                                |                                                                         |                                         |
|------------|--------------------------------|-------------------------------------------------------------------------|-----------------------------------------|
| dio2 (3)   | 0.0338;<br>0.0256;<br>0.000866 | Thyroid hormone pathways, tenuous                                       | McMenamin et al. 2014                   |
| dtnbp1 (2) | 0.00120;<br>0.0456             | Melanosome biogenesis                                                   | Wei 2006                                |
| ednrb (2)  | 0.0035;<br>0.0005              | Guanine synthesis in iridophores, melanoblast migration                 | Higdon et al. 2013; Kelsh et al. 2009   |
| egfr (2)   | 0.0197;<br>0.000566            | Melanocyte pigmentation and differentiation                             | Jost et al. 2000; Hirobe 2011           |
| fbxw4 (2)  | 0.00268;<br>0.0183             | Melanophore organization                                                | Kawakami et al. 2000; Ahi and Sefc 2017 |
| gart       | 0.0000494                      | Purine synthesis, affecting iridophores, xanthophores, and melanophores | Ng et al. 2009                          |
| gas1 (2)   | 0.0264;<br>0.0191              | Guanine synthesis in iridophores                                        | Higdon et al. 2013                      |
| gne (2)    | 0.00571;<br>0.0361             | Sialic acid pathway                                                     | Nie et al. 2016                         |
| hps3       | 0.0202                         | Melanosome biogenesis                                                   | Suzuki et al. 2001                      |
| itgb1 (2)  | 0.0191;<br>0.0469              | Guanine synthesis in iridophores                                        | Higdon et al. 2013                      |
| lef1       | 0.0190                         | Melanocyte differentiation and development, melanogenesis               | Song et al. 2017                        |
| leo1       | 0.0000381                      | Melanocyte assembly                                                     | Johnson et al. 1995                     |
| mitf       | 0.0466                         | Melanocyte regulation                                                   | Levy et al. 2006; Hou and Pavan 2008    |
| mlph       | 0.00568                        | Melanosome transport                                                    | Cirera et al. 2013                      |
| mthfd1     | 0.0430                         | Purine synthesis                                                        | Field et al. 2011                       |
| mreg       | 0.0156                         | Melanosome transport                                                    | Wu et al. 2012                          |
| notch1 (3) | 0.00681;<br>0.0139;<br>0.0487  | Melanocyte production                                                   | Shouwey and Beerman 2008                |
| prtfdc1    | 0.00000672                     | Guanine synthesis                                                       | Higdon et al. 2013                      |
| qdpr       | 0.0372                         | Guanine and Pteridine synthesis                                         | Xu et al. 2014; Ponzzone et al. 2004    |
| qnr-71 (2) | 0.0316;<br>0.0262              | Melanosomal protein                                                     | Turque et al. 1996; Planque et al. 1999 |
| rab3d      | 0.0321                         | Putative guanine synthesis in iridophores                               | Higdon et al. 2013                      |
| rab7a      | 0.0319                         | Putative guanine synthesis in iridophores                               | Higdon et al. 2013                      |
| rabggta    | 0.000864                       | Guanine synthesis                                                       | Swank et al. 1993                       |
| scarb2     | 0.0329                         | Putative guanine synthesis in iridophores                               | Higdon et al. 2013                      |
| shroom2    | 0.0142                         | Pigment accumulation                                                    | Fairbank et al. 2006; Lee et al. 2009   |
| sox9       | 0.0228                         | Melanin production                                                      | Passeron et al. 2007                    |
| tbx15      | 0.00838                        | Pigmentation boundaries                                                 | Candille et al. 2004                    |
| tyrp1      | 0.0200                         | Melanogenesis                                                           | Rieder et al. 2001                      |
| xdh (2)    | 0.0346;<br>0.0384              | Pteridine synthesis                                                     | Thorsteinsdottir and Frost 1986         |

187

188 Table 2. Differentially expressed candidate color genes in our *Xenopus* annotation. Parentheses in the gene symbol  
189 column indicate the number of transcripts that mapped to a particular gene. The pathway column indicates what  
190 color or pattern production pathway this gene is a part of.

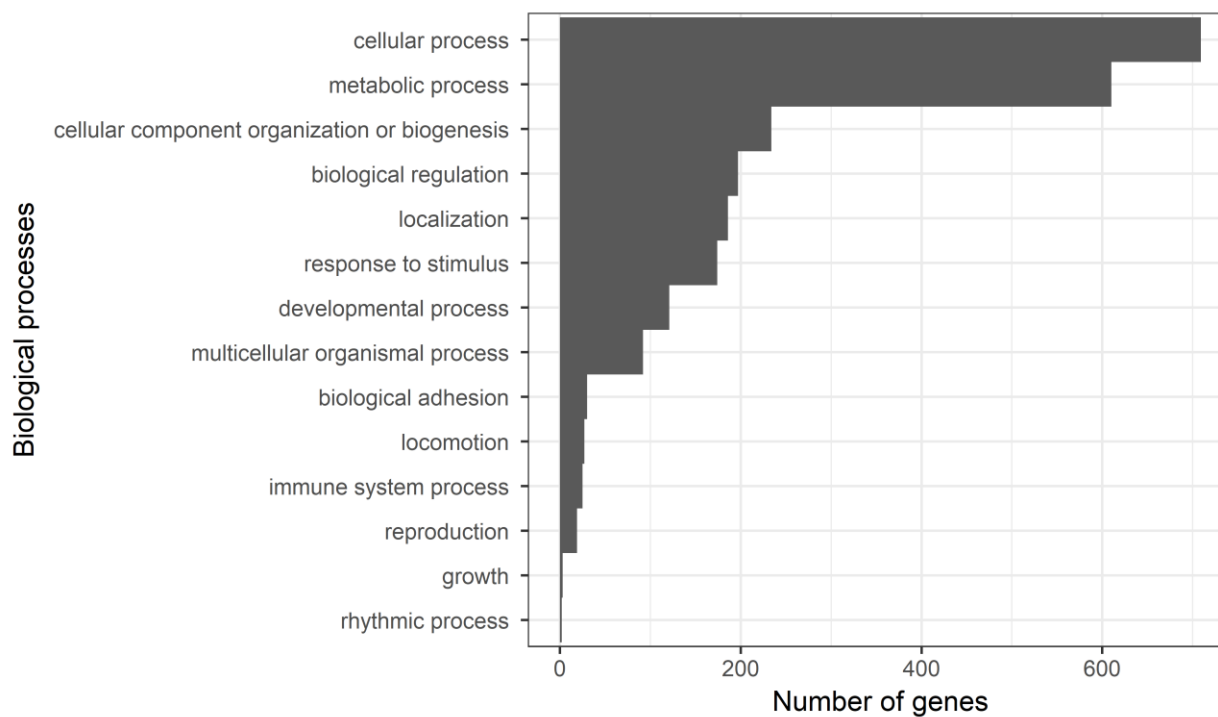

191

192 Figure 3. Gene ontology terms from PANTHER. Bars depict the number of genes in each biological process GO  
193 category.

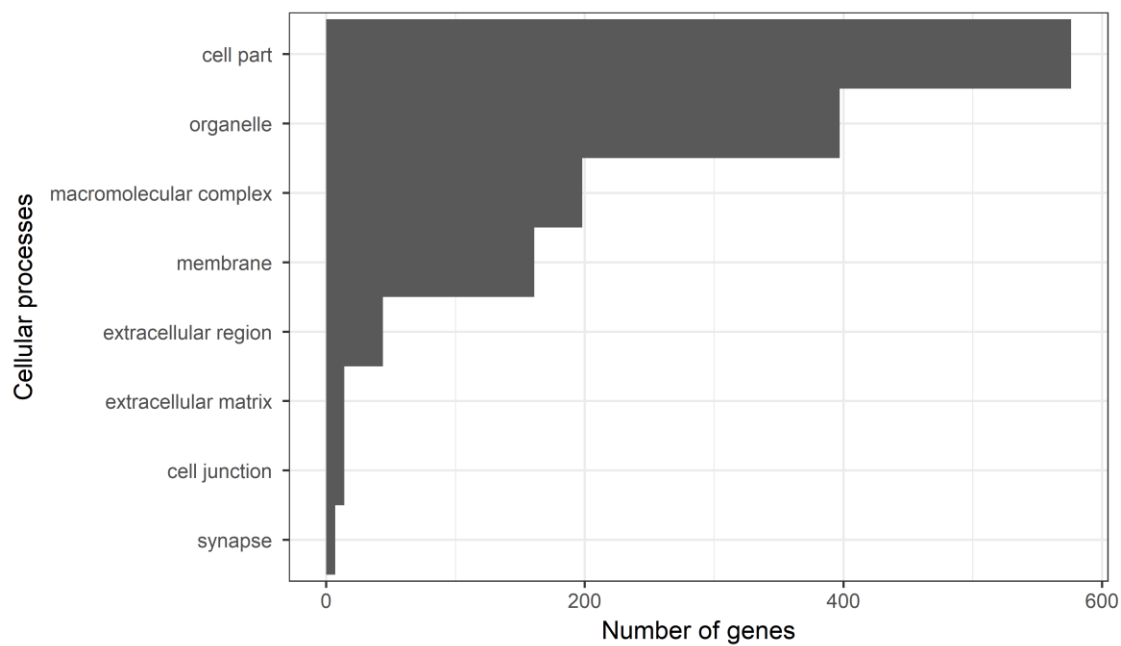

194

195 Figure 4. Gene ontology terms from PANTHER. Bars depict the number of genes in each cellular process GO category.

196

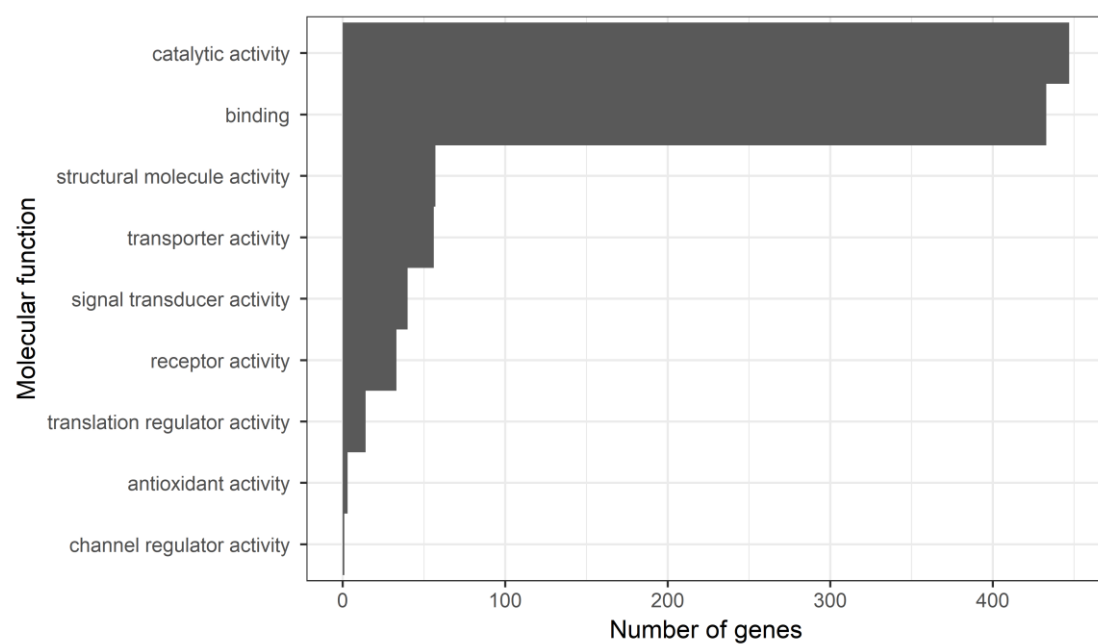

197

198 Figure 5. Gene ontology terms from PANTHER. Bars depict the number of genes in each molecular function GO  
199 category.

200

201

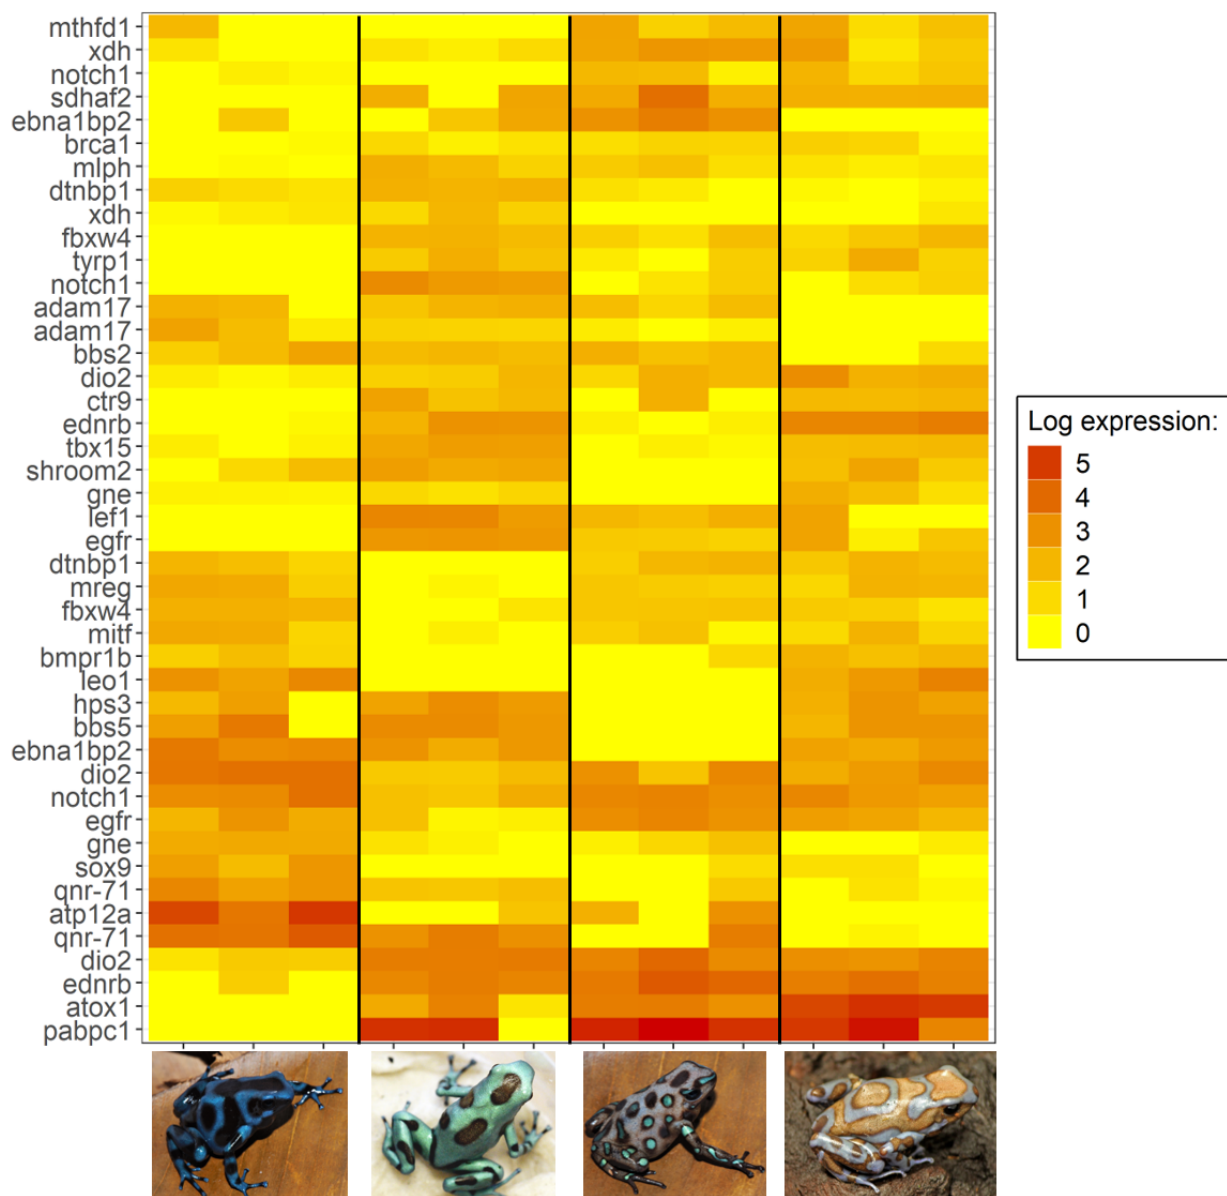

202

203 Figure 6. Log-fold expression (transcripts per million) levels of putatively melanin related genes in *Dendrobates*  
204 *auratus*. Each individual is represented on the x-axis, and the y-axis represents expression levels for each transcript  
205 that annotated to an melanophore-related gene. Genes represented more than once mapped to multiple transcripts.  
206 Expression for this heatmap was calculated using the transcripts per million from Kallisto, to which we added 1 and  
207 log transformed the data (i.e., expression =  $\log(\text{transcripts per million} + 1)$ ).

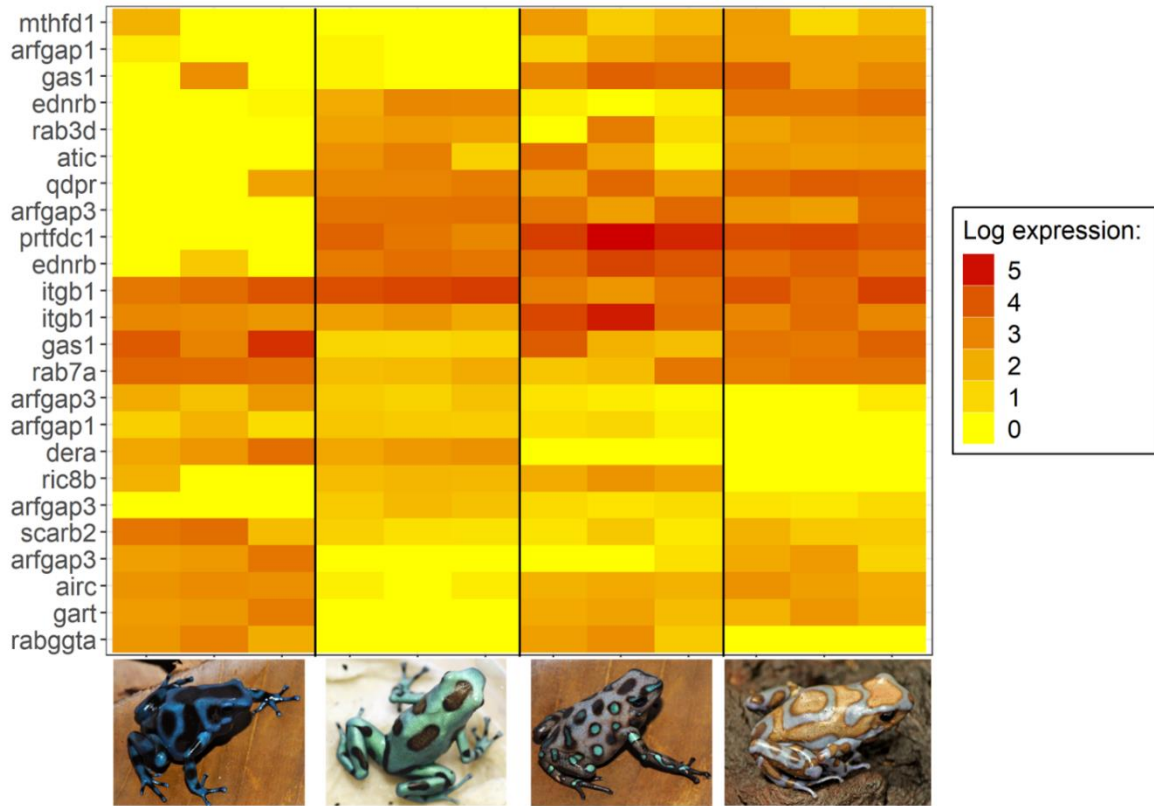

208

209 Figure 7. Log-fold expression (transcripts per million) levels of putatively iridophore-related genes in *Dendrobates*  
 210 *auratus*. Each individual is represented on the x-axis, and the y-axis represents expression levels for each transcript  
 211 that annotated to an iridophore-related gene. Genes represented more than once mapped to multiple transcripts.  
 212 Expression for this heatmap was calculated using the transcripts per million from Kallisto, to which we added 1 and  
 213 log transformed the data (i.e., expression =  $\log(\text{transcripts per million} + 1)$ ).

214

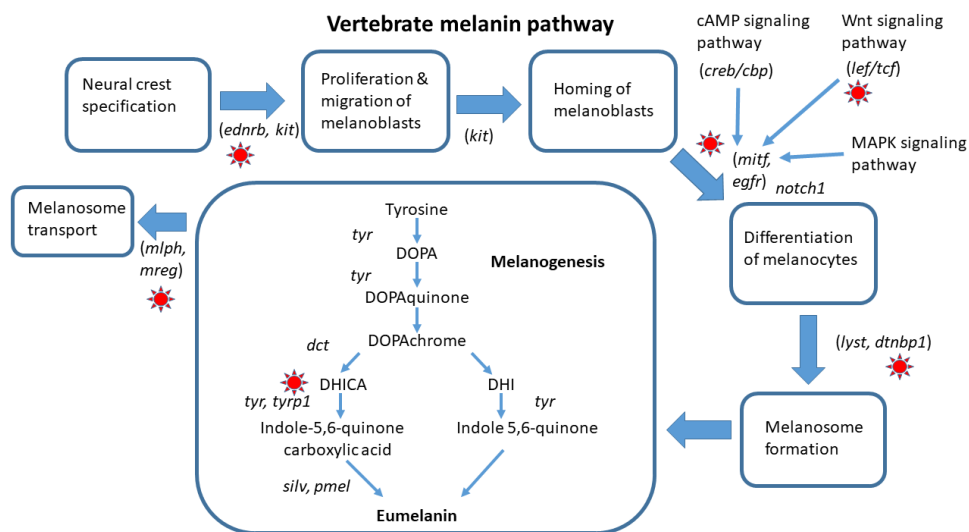

215 Figure 8. Melanin pigmentation pathway in vertebrates. Here we highlight differentially expressed genes in our  
216 dataset with a red sun.

217

218 **Discussion:**

219 The genetic mechanisms of color variation are poorly known, particularly in amphibians. Here, we address  
220 this deficiency by providing some of the first genomic data relevant to color production in amphibians, with a focus  
221 on gene expression in the skin during development. Our model system and strategy support the identification of  
222 genes likely to regulate color and pattern elements across different morphs of a highly variable species. By combining  
223 analyses of differential expression with a targeted search based on an extensive list of candidate genes for  
224 developmental control of coloration (approximately 500 genes), we identified multiple genes that were differentially  
225 expressed among morphs which have been demonstrated to play important roles in the production of color in other  
226 taxa.

227 We found differential expression of multiple genes in two major suites of color genes, those that influence  
228 melanic coloration (black, brown, and grey) and iridophore genes (blue and green coloration). Additionally, we found  
229 a few key pteridine pigment genes that are known to influence primarily yellow amphibian coloration that were  
230 differentially expressed between morphs. Given that our color morphs had a black versus brown color coupled with  
231 either blue or green pattern elements on top of the background, these results seem biologically relevant and  
232 indicative of genes that control color and pattern in *Dendrobates auratus*. As a result, we divide our discussion into  
233 three main parts, focusing on the genes that influence dark background coloration, purine synthesis, and iridophore  
234 biology. We then discuss a few genes that are part of other pathways (e.g. pteridine synthesis), before proposing  
235 genes that have yet to be implicated in the production of color but are plausible candidate genes.

236

237 *Melanin-related gene expression:*

238 Our study frogs have skin with either a black or brown background, both of which are forms of melanic  
239 coloration, which provides the basis for contrasting patterns in many vertebrates as well as non-vertebrate taxa  
240 (Sköld et al. 2016). Melanin is synthesized from tyrosine in vertebrates, via the action of a set of key enzymes (e.g.,  
241 tyrosinase, tyrosinase-like protein 1 and 2). We identified a suite of differentially expressed genes that are involved in  
242 the production of melanophores and melanin in this study (Figure 6 and 8), many of which have been tied to the  
243 production of relatively lighter phenotypes in previous studies. Intriguingly, our results parallel similar findings in  
244 *Oophaga histrionica*, a species of poison frog in which mutations in the *mc1r* gene affecting melanogenesis have  
245 produced a lighter, more brownish background in some populations (Posso-Terranova and Andrés 2017). In a pattern  
246 reminiscent of their results, we found that *mc1r* was only lowly expressed in one super blue frog, and that a variety  
247 of other genes linked to lighter phenotypes followed a similar pattern of expression.

248 For example, many of the differentially expressed color genes in our dataset are active contributors to the  
249 tyrosinase pathway (*tyrp1*, *mitf*, *sox9*, *lef1*, *mlph*, *leo1*, *adam17*, *egfr*, *ednrb*). This pathway is enzymatically regulated  
250 by tyrosinase as well as other enzymes and cofactors and is key to the production of melanin (Murisier and  
251 Beermann 2006). The *tyrp1* enzyme catalyzes several key steps in the melanogenesis pathway in melanosomes (and  
252 melanocytes), has been shown to affect coloration in a wide variety of vertebrates (Murisier and Beermann 2006;  
253 Braasch et al. 2009), and is important for maintaining the integrity of the melanocytes (Gola et al. 2012). In some  
254 mammals *tyrp1* has been shown to change the relative abundances of the pigments pheomelanin and eumelanin,  
255 thereby producing an overall lighter phenotype (Videira et al. 2013). Our data mimic this pattern as *tyrp1* is not  
256 expressed in the blue-black morph, and only expressed at low levels in some San Felix individuals. Pheomelanin has  
257 only been identified in the skin of one species of frog (Wolnicka-Glubisz et al. 2012), and it is unclear whether  
258 pheomelanin is generally present in ectotherms. Further, mutations in *tyrp1* change melanic phenotypes through  
259 different mechanisms in fish (and possibly other ectotherms) than in mammals (Braasch et al. 2009; Cal et al. 2017),  
260 and the mechanisms by which *tyrp1* one affects pigmentation in amphibians are still being elucidated.

261 The *mitf* (microphthalmia-associated transcription factor) locus codes for a transcription factor that plays a  
262 dominant role in melanogenesis, and has been called the “master regulator” of melanogenesis (Kawakami and Fisher  
263 2017). In our study, *mitf* expression was lowest in the microspot population, the population with the least melanic



264 coloration, and most highly expressed in the blue-black morph (although it is worth noting that blue and green colors  
265 are also influenced by melanin to some degree). The *mitf* locus is, itself, targeted by a suite of transcriptional factors  
266 including two which were differentially expressed in our dataset: *sox9* and *lef1*. The *sox9* gene is upregulated during  
267 melanocyte differentiation, can promote melanocyte differentiation, and has been demonstrated to be an important  
268 melanocytic transcription factor (Cheung and Briscoe 2003). Further, *sox9* is up-regulated in human skin after UVB  
269 exposure and has been demonstrated to increase pigmentation. *Sox9* was not expressed in the microspot morph and  
270 was only expressed (at a low level) in one San Felix individual. Another important transcription factor is the lymphoid  
271 enhancer-binding factor locus (*lef1*), which mediates *Wnt* signaling in the context of melanocyte differentiation and  
272 development, with important effects on melanogenesis (Song et al. 2017). Upregulation of this gene has been found  
273 to reduce synthesis of the darkest melanic pigment eumelanin, resulting in lighter coloration in mink and other  
274 vertebrates (Song et al. 2017). In our study, *lef1* showed very low expression in the blue and black morph, compared  
275 to the other three morphs. Comparing the photos of the four morphs (Fig. 1), it can readily be seen that blue and  
276 black morph has substantially darker (black) background coloration, compared to the other three, which all have a  
277 lighter, brownish background coloration indicating that *lef1* is a likely contributor to the background dorsal coloration  
278 between color morphs in *Dendrobates auratus*.

279 Just as *mitf* is a target of the transcription factors *lef1* and *sox9*, *mitf* targets endothelin receptors, a type of G  
280 Protein Coupled Receptor (GPCR). Endothelin receptors mediate several crucial developmental processes,  
281 particularly the development of neural crest cell populations (Braasch and Schartl 2014). Three paralogous families of  
282 these receptors have been identified in vertebrates: endothelin receptor B1 (*ednrb1*), endothelin receptor B2  
283 (*ednrb2*), and endothelin receptor A (*ednra*). *Ednrb* is involved in producing the different male color morphs of the  
284 Ruff (a sandpiper), and it is only expressed in black males (Ekblom et al. 2012). In our study, *ednrb* is not expressed in  
285 the blue-black morph, and only one of the *ednrb* transcripts is expressed in the San Felix morph. Mutations in *ednrb1*  
286 and *ednrb2* have been found to affect pigment cell development (especially melanocytes and iridophores) in a variety  
287 of vertebrate species (Braasch and Schartl 2014). These receptors show divergent patterns of evolution in the ligand-  
288 binding region in African lake cichlids, and appear to have evolved divergently in association with adaptive radiations  
289 in this group (Diepeveen and Salzburger 2011). The *ednrb2* (endothelin receptor B2) locus encodes a transmembrane

290 receptor that plays a key role in melanoblast (a precursor cell of the melanocyte) migration (Kelsh et al. 2009). This  
291 receptor interacts with the *edn3* ligand. Mutations affecting this ligand/receptor system in *Xenopus* affect pigment  
292 cell development (Kawasaki-Nishihara et al. 2011).

293 The *leo1* (LEO1 Homolog) and *ctr9* (CTR9 Homolog) loci are both components of the yeast polymerase-  
294 associated factor 1 (*Paf1*) complex, which affects the development of the heart, ears and neural crest cells in  
295 zebrafish, with dramatic downstream effects on pigment cells and pigmentation, as well as on the Notch signaling  
296 pathway (Akanuma et al. 2007; Nguyen et al. 2010). Perhaps unsurprisingly then, we found that *notch1*, a well-known  
297 member of the Notch Signaling Pathway, was differentially expressed between color morphs. Mutations in this gene  
298 are known to affect skin, hair and eye pigmentation in humans through effects on melanocyte stem cells (Schouwey  
299 and Beermann 2008). This indicates that *notch1* is a good candidate gene for pattern development in poison frogs.

300 A number of other melanogenesis-related genes were found to be differentially expressed between morphs,  
301 such as *brca1*. Mice with a homozygous mutation of the tumor suppressing *brca1* gene show altered coat coloration,  
302 often producing a piebald appearance (Ludwig et al. 2001). The precise mechanism behind this is ambiguous, and it  
303 may involve either *mitf* or *p53* (Beuret et al. 2011; Tonks et al. 2012). *Bmpr1b* is a bone morphogenic protein which is  
304 known to inhibit melanogenesis; when *bmpr1b* is downregulated via UV exposure it enhances melanin production  
305 and leads to darker pigmentation (Yaar et al. 2006). Some of the other genes (e.g. *mlph*, or melanophilin) show the  
306 same pattern of expression across morphs as *lef1*, suggesting that multiple genes may contribute to the difference  
307 between lighter and darker background coloration in this species. The product of the melanophilin gene forms a  
308 complex that combines with two other proteins and binds melanosomes to the cell cytoskeleton, facilitating  
309 melanosome transport within the cell. Variants of this gene are associated with “diluted”, or lighter-colored,  
310 melanism in a number of vertebrates (Cirera et al. 2013). Similarly, the *mreg* (melanoregulin) gene product functions  
311 in melanosome transport and hence is intimately involved in pigmentation (Wu et al. 2012). Mutations at this locus  
312 cause “dilute” pigmentation phenotypes in mice.

313 In summary, we have found a number of differentially expressed genes that influence melanic coloration  
314 which seem to be important between color morphs with a true, black background pattern versus those with a more

315 dilute, brown colored background pattern. Our results parallel similar findings in *Oophaga histrionica*, a species of  
316 poison frog in which mutations in the *mc1r* gene affecting melanogenesis have produced a lighter, more brownish  
317 background in some populations (Posso-Terranova and Andrés 2017). In addition to *mc1r*, we have identified a suite  
318 of genes with the same expression pattern that are ultimately influenced by *mc1r* activity; many of these genes have  
319 been linked to lighter phenotypes in other taxa.

320

321 *Purine synthesis and iridophore genes:*

322 The bright coloration of *D. auratus* is confined to the green-blue part of the visual spectrum (with the  
323 exception of some brownish-white varieties) in most populations, and thus iridophores are likely to play a role in the  
324 color variation displayed across different populations of this species. Higdon et al. (2013) identified a variety of genes  
325 that are components of the guanine synthesis pathway and show enriched expression in zebrafish iridophores. A  
326 number of these genes (*hpert1*, *ak5*, *dera*, *ednrb2*, *gas1*, *ikpkg*, *atic*, *airc*, *prtfdc1*) were differentially expressed  
327 between the different morphs of *D. auratus* investigated here (Figure 8). The *gart* gene codes for a tri-function  
328 enzyme that catalyzes three key steps in the *de novo* purine synthesis pathway (Ng et al. 2009). This locus has been  
329 associated with critical mutations affecting all three types of chromatophores in zebrafish, through effects on the  
330 synthesis of guanine (iridophores), sepiapterin (xanthophores) and melanin (melanocytes)(Ng et al. 2009). Zebrafish  
331 mutants at this locus can show dramatically reduced numbers of iridophores, resulting in a lighter, or less saturated  
332 color phenotype. Similarly, the *airc* gene plays a critical role in guanine synthesis, and yeast with mutations in this  
333 gene leading to aberrant forms of the transcribed protein are unable to synthesize adenine and accumulate a visible  
334 red pigment (Tolstorukov and Efremov 1984; Sychrova et al. 1999). Similarly, the *mthfd* (methylenetetrahydrofolate  
335 dehydrogenase, cyclohydrolase and formyltetrahydrofolate synthetase 1) gene also affects the *de novo* purine  
336 synthesis pathway (Christensen et al. 2013). The genes *airc*, *gart*, and *mthfd* had similar expression patterns and  
337 were very lowly expressed in the mostly green microspot population. The gene *prtfdc1* is highly expressed in  
338 iridophores, and encodes an enzyme which catalyzes the final step of guanine synthesis (Higdon et al. 2013); *prtfdc1*  
339 had very low expression in the dark blue-black morph, which may be an indication that it plays a role in the

340 reflectance from iridophores. Further, *prtfdc1* was highly expressed in the San Felix and super blue morphs, both of  
341 which have visible small white ‘sparkles’ on the skin which are likely produced by the iridophores.

342           How the guanine platelets are formed in iridophores remains an open question. Higdon et al. (2013)  
343 proposed that ADP Ribosylation Factors (ARFs) and Rab GTPases are likely to play crucial roles in this context. ARFs  
344 are a family of ras-related GTPases that control transport through membranes and organelle structure. We identified  
345 one ARF protein (*arf6*) and two ARF activating proteins (*arfgap1* and *arfgap2*) that were differentially expressed  
346 across the *D. auratus* morphs. We also identified four different Rab GTPases as differentially expressed (*rab1a*, *rab3c*,  
347 *rab3d*, *rab7a*). Mutations at the *rabggt*a (Rab geranylgeranyl transferase, a subunit) locus cause abnormal pigment  
348 phenotypes in mice (e.g. “gunmetal”), are known to affect the guanine synthesis pathway (Gene et al. 2001), and are  
349 similarly differentially expressed between color morphs in our dataset. These genes are likely candidates to affect  
350 coloration in *Dendrobates auratus* given that both the green and blue pattern elements are probably iridophore-  
351 dependent colors.

352

353 *Pteridine synthesis:*

354           A number of the genes identified as differentially expressed are involved in copper metabolism (*sdhaf2*,  
355 *atox1*, *atp7b*). Copper serves as a key cofactor for tyrosinase in the melanogenesis pathway and defects in copper  
356 transport profoundly affect pigmentation (Setty et al. 2008). Another gene, the xanthine hydrogenase (*xdh*) locus, was  
357 also found to be differentially expressed between morphs, and this gene, which is involved in the oxidative  
358 metabolism of purines, affects both the guanine and pteridine synthesis pathways. Additionally, it has been shown to  
359 be critically important in the production of color morphs in the axolotl. When *xdh* was experimentally inhibited  
360 axolotls had reduced quantities of a number of pterins, and also had a dramatic difference in color phenotype with  
361 *xdh*-inhibited individuals showing a ‘melanoid’ (black) appearance (Thorsteinsdottir and Frost 1986). Furthermore,  
362 *xdh* deficient frogs show a blue coloration in typically green species (Frost 1978; Frost and Bagnara 1979). We note  
363 here that one *xdh* transcript showed little (one individual) or no (2 individuals) expression in the bluest morph (blue-  
364 black). Similarly, when pigments contained in the xanthophores that absorb blue light are removed, this can lead to

365 blue skin (Bagnara et al. 2007). We also found another gene involved in pteridine synthesis, *qdpr* (quinoid  
366 dihydropteridine reductase), was only expressed in the populations with a lighter blue or green coloration. Mutations  
367 in this gene result in altered patterns of pteridine (e.g. sepiapterin) accumulation (Ponzzone et al. 2004). We believe  
368 that *xdh* and *qdpr* are good candidates for variability in coloration in poison frogs.

369

370 *Novel candidate genes for coloration:*

371 In addition to those genes that have previously been linked to coloration which we have identified in our  
372 study, we would like to propose several others as candidate color genes, based on their expression patterns in our  
373 data. Although most research on blue coloration focuses on light reflecting from iridophores, this has generally not  
374 been explicitly tested and there is some evidence that blue colors may arise through different mechanisms (reviewed  
375 in (Bagnara et al. 2007). In particular, there is evidence that blue in amphibians can come from the collagen matrix in  
376 the skin, as grafts in which chromatophores failed to thrive show a blue coloration (Bagnara et al. 2007).  
377 Furthermore, keratinocytes surround melanocytes, and they play a key role in melanosome transfer (Ando et al.  
378 2012). In light of this evidence, we propose a number of keratinocyte and collagen genes which are differentially  
379 expressed in our dataset as further candidate genes for coloration. Amongst these are *krt12*, and *krt18*, *col1a1*,  
380 *col5a1*, and *col14a1*. These genes, and those like them, may be playing a critical role in coloration in these frogs.

381

382 *Conclusion:*

383 The mechanisms that produce variation in coloration in both amphibians and aposematic species are poorly  
384 characterized, particularly in an evolutionary context. Here we have taken a transcriptomics-based approach to  
385 elucidating the genetic mechanisms underlying color and pattern development in a poison frog. We found evidence  
386 that genes characterizing the melanin and iridophore pathways are likely the primary contributors to color and  
387 pattern differences in this aposematic species. Additionally, a handful of genes which contribute to the pteridine  
388 pathway seem to be playing a role in differential color production as well. However, the specific mechanisms by

389 which these genes work, as well as how they interact to produce color phenotypes, remains an outstanding issue  
390 given the complex nature of each of these pathways. Still, our data indicate that genes involved at every step along  
391 the melanin and iridophore pathways from chromatophore production, through pigmentation production and  
392 deposition, influence differences in coloration between these morphs. These results make sense in the context of the  
393 overall color and pattern of these frogs, and provide a number of promising starting points for future investigations  
394 of the molecular, cellular and physiological mechanisms underlying coloration in amphibians.

395

#### 396 **Acknowledgments:**

397 Animal care and use for this research was approved by East Carolina University's IACUC (AUP #D281). Funding for this  
398 project was provided by NSF DEB 165536 and an East Carolina University Thomas Harriot College of Arts and Sciences  
399 Advancement Council Distinguished Professorship to K Summers. We thank Evan Twomey for insightful comments on  
400 this manuscript.

401

#### 402 **Literature cited:**

- 403 Ahi, E. P., and K. M. Sefc. 2017. Anterior-posterior gene expression differences in three Lake Malawi cichlid fishes  
404 with variation in body stripe orientation. *PeerJ* e4080.
- 405 Akanuma, T., S. Koshida, A. Kawamura, Y. Kishimoto, and S. Takada. 2007. Paf1 complex homologues are required for  
406 Notch-regulated transcription during somite segmentation. *EMBO Rep.* 8:858–863.
- 407 Ando, H., Y. Niki, M. Ito, K. Akiyama, M. S. Matsui, D. B. Yarosh, and M. Ichihashi. 2012. Melanosomes are transferred  
408 from melanocytes to keratinocytes through the processes of packaging, release, uptake, and dispersion. *J.*  
409 *Invest. Dermatol.* 132:1222–1229. Elsevier Masson SAS.
- 410 Bagnara, J. T., P. J. Fernandez, and R. Fujii. 2007. On the blue coloration of vertebrates. *Pigment Cell Res.* 20:14–26.
- 411 Bankevich, A., S. Nurk, D. Antipov, A. A. Gurevich, M. Dvorkin, A. S. Kulikov, V. M. Lesin, S. I. Nikolenko, S. Pham, A. D.

- 412 Prjibelski, A. V. Pyshkin, A. V. Sirotkin, N. Vyahhi, G. Tesler, M. A. Alekseyev, and P. A. Pevzner. 2012. SPAdes: A  
413 new genome assembly algorithm and its applications to single-cell sequencing. *J. Comput. Biol.* 19:455–477.
- 414 Bateman, A., M. J. Martin, C. O’Donovan, M. Magrane, E. Alpi, R. Antunes, B. Bely, M. Bingley, C. Bonilla, R. Britto, B.  
415 Bursteinas, H. Bye-Ajee, A. Cowley, A. Da Silva, M. De Giorgi, T. Dogan, F. Fazzini, L. G. Castro, L. Figueira, P.  
416 Garmiri, G. Georghiou, D. Gonzalez, E. Hatton-Ellis, W. Li, W. Liu, R. Lopez, J. Luo, Y. Lussi, A. MacDougall, A.  
417 Nightingale, B. Palka, K. Pichler, D. Poggioli, S. Pundir, L. Pureza, G. Qi, S. Rosanoff, R. Saidi, T. Sawford, A.  
418 Shypitsyna, E. Speretta, E. Turner, N. Tyagi, V. Volynkin, T. Wardell, K. Warner, X. Watkins, R. Zaru, H. Zellner, I.  
419 Xenarios, L. Bougueleret, A. Bridge, S. Poux, N. Redaschi, L. Aimo, G. ArgoudPuy, A. Auchincloss, K. Axelsen, P.  
420 Bansal, D. Baratin, M. C. Blatter, B. Boeckmann, J. Bolleman, E. Boutet, L. Breuza, C. Casal-Casas, E. De Castro, E.  
421 Coudert, B. Cuche, M. Doche, D. Dornevil, S. Duvaud, A. Estreicher, L. Famiglietti, M. Feuermann, E. Gasteiger, S.  
422 Gehant, V. Gerritsen, A. Gos, N. Gruaz-Gumowski, U. Hinz, C. Hulo, F. Jungo, G. Keller, V. Lara, P. Lemercier, D.  
423 Lieberherr, T. Lombardot, X. Martin, P. Masson, A. Morgat, T. Neto, N. Nospikel, S. Paesano, I. Pedruzzi, S.  
424 Pilbout, M. Pozzato, M. Pruess, C. Rivoire, B. Roechert, M. Schneider, C. Sigrist, K. Sonesson, S. Staehli, A. Stutz,  
425 S. Sundaram, M. Tognolli, L. Verbregue, A. L. Veuthey, C. H. Wu, C. N. Arighi, L. Arminski, C. Chen, Y. Chen, J. S.  
426 Garavelli, H. Huang, K. Laiho, P. McGarvey, D. A. Natale, K. Ross, C. R. Vinayaka, Q. Wang, Y. Wang, L. S. Yeh, and  
427 J. Zhang. 2017. UniProt: The universal protein knowledgebase. *Nucleic Acids Res.* 45:D158–D169. Oxford  
428 University Press.
- 429 Bates, H. 1862. Contributions to an insect fauna of the Amazon valley (Lepidoptera: Heliconidae). *Biol. J. Linn. Soc.*  
430 23:495–566.
- 431 Bauer, G. L., C. Praetorius, A. Schepsky, D. A. Swing, T. N. O. Sullivan, N. G. Copeland, and N. A. Jenkins. 2009. The role  
432 of MITF phosphorylation sites during coat color and eye development in mice analyzed by bacterial artificial  
433 chromosome transgene rescue. *Genetics* 594:581–594.
- 434 Bennett, D. C., and M. L. Lamoreux. 2003. The color loci of mice – A genetic century. *Pigment Cell Res.* 16:333–344.
- 435 Beuret, L., M. Ohanna, T. Strub, M. Allegra, I. Davidson, C. Bertolotto, and R. Ballotti. 2011. BRCA1 is a new MITF  
436 target gene. *Pigment Cell Melanoma Res.* 24:725–727.

- 437 Bolger, A. M., M. Lohse, and B. Usadel. 2014. Trimmomatic: A flexible trimmer for Illumina sequence data.  
438 *Bioinformatics* 30:2114–2120.
- 439 Braasch, I., D. Liedtke, J. N. Volff, and M. Scharl. 2009. Pigmentary function and evolution of *tyrp1* gene duplicates in  
440 fish. *Pigment Cell Melanoma Res.* 22:839–850.
- 441 Braasch, I., and M. Scharl. 2014. Evolution of endothelin receptors in vertebrates. *Gen. Comp. Endocrinol.* 209:21–  
442 34. Elsevier Inc.
- 443 Bray, N. L., H. Pimentel, P. Melsted, and L. Pachter. 2016. Near-optimal probabilistic RNA-seq quantification. *Nat.*  
444 *Biotechnol.* 34:525–527.
- 445 Briolat, E. S., E. R. Burdfield-steel, S. C. Paul, H. R. Katja, B. M. Seymoure, T. Stankowich, and A. M. M. Stuckert. 2018.  
446 Diversity in warning coloration : selective paradox or the norm ? , doi: 10.1111/brv.12460.
- 447 Brown, J. L., E. Twomey, A. Amezcuita, M. B. DeSouza, J. Caldwell, S. Lötters, R. Von May, P. R. Melo-sampaio, D.  
448 Mejía-vargas, P. Perez-peña, M. Pepper, E. H. Poelman, M. Sanchez-rodriguez, and K. Summers. 2011. A  
449 taxonomic revision of the Neotropical poison frog genus *Ranitomeya* (Amphibia: Dendrobatidae). *Zootaxa*  
450 3083:1–120.
- 451 Buchfink, B., C. Xie, and D. H. Huson. 2015. Fast and sensitive protein alignment using DIAMOND. *Nat. Methods*  
452 12:59–60.
- 453 Cal, L., P. Suarez-Bregua, J. M. Cerdá-Reverter, I. Braasch, and J. Rotllant. 2017. Fish pigmentation and the  
454 melanocortin system. *Comp. Biochem. Physiol. -Part A Mol. Integr. Physiol.* 211:26–33. Elsevier.
- 455 Cheung, M., and J. Briscoe. 2003. Neural crest development is regulated by the transcription factor Sox9.  
456 *Development* 130:5681–5693.
- 457 Christensen, K. E., L. Deng, K. Y. Leung, E. Arning, T. Bottiglieri, O. V. Malysheva, M. A. Caudill, N. I. Krupenko, N. D.  
458 Greene, L. Jerome-Majewska, R. E. MacKenzie, and R. Rozen. 2013. A novel mouse model for genetic variation  
459 in 10-formyltetrahydrofolate synthetase exhibits disturbed purine synthesis with impacts on pregnancy and  
460 embryonic development. *Hum. Mol. Genet.* 22:3705–3719.



- 461 Cirera, S., M. N. Markakis, K. Christensen, and R. Anistoroaei. 2013. New insights into the melanophilin (MLPH) gene  
462 controlling coat color phenotypes in American mink. *Gene* 527:48–54. Elsevier B.V.
- 463 Coordinators, N. R. 2016. Database resources of the National Center for Biotechnology Information. *Nucleic Acids*  
464 *Res.* 44:7–19.
- 465 Diepeveen, E. T., and W. Salzburger. 2011. Molecular characterization of two endothelin pathways in east african  
466 cichlid fishes. *J. Mol. Evol.* 73:355–368.
- 467 Duellman, W. E., and L. Trueb. 1986. *Biology of Amphibians*. The John Hopkins University Press, Baltimore.
- 468 Ekblom, R., L. L. Farrell, D. B. Lank, and T. Burke. 2012. Gene expression divergence and nucleotide differentiation  
469 between males of different color morphs and mating strategies in the ruff. *Ecol. Evol.* 2:2485–2505.
- 470 Frost, S. K. 1978. Developmental aspects of pigmentation in the Mexican leaf frog, *Pachymedusa dacnicolor*.
- 471 Frost, S. K., and J. T. Bagnara. 1979. Allopurinol-Induced Melanism In The Tiger Salamander (*Ambystoma iigrinum*  
472 *nebulosum*). *J. Exp. Zool.* 209:455–465.
- 473 Gene, H. P. S.-, T. Suzuki, W. Li, Q. Zhang, E. K. Novak, E. V Sviderskaya, A. Wilson, D. C. Bennett, B. A. Roe, R. T.  
474 Swank, and R. A. Spritz. 2001. The gene mutated in cocoa mice, carrying a defect of organelle biogenesis, is a  
475 homologue of the human Hermansky-Pudlak Syndrom-3 gene. *Genomics* 78:30–37.
- 476 Gola, M., R. Czajkowski, A. Bajek, A. Dura, and T. Drewa. 2012. Melanocyte stem cells: Biology and current aspects.  
477 *Med. Sci. Monit.* 18:RA155-RA159.
- 478 Gosner, K. L. 1960. A simplified table for staging anuran embryos and larvae with notes on identification.  
479 *Herpetologica* 16:183–190.
- 480 Haas, B. J., A. Papanicolaou, M. Yassour, M. Grabherr, D. Philip, J. Bowden, M. B. Couger, D. Eccles, B. Li, M. D.  
481 Macmanes, M. Ott, J. Orvis, and N. Pochet. 2014. De novo transcript sequence reconstruction from RNA-Seq:  
482 reference generation and analysis with Trinity. *Nat. Protoc.* 8:1–43.
- 483 Hammond, S. A., R. L. Warren, B. P. Vandervalk, E. Kucuk, H. Khan, E. A. Gibb, P. Pandoh, H. Kirk, Y. Zhao, M. Jones, A.

- 484 J. Mungall, R. Coope, S. Pleasance, R. A. Moore, R. A. Holt, J. M. Round, S. Ohora, B. V. Walle, N. Veldhoen, C. C.  
485 Helbing, and I. Birol. 2017. The North American bullfrog draft genome provides insight into hormonal regulation  
486 of long noncoding RNA. *Nat. Commun.* 8:1–8. Springer US.
- 487 Higdon, C. W., R. D. Mitra, and S. L. Johnson. 2013. Gene expression analysis of zebrafish melanocytes, iridophores,  
488 and retinal pigmented epithelium reveals indicators of biological function and developmental origin. *PLoS One*  
489 8:e67801.
- 490 Kannan, S., J. Hui, and K. Mazooji. 2016. Shannon: An information-optimal de novo RNA-Seq assembler. 1–14.
- 491 Kawakami, A., and D. E. Fisher. 2017. The master role of microphthalmia-associated transcription factor in  
492 melanocyte and melanoma biology. *Lab. Investig.* 97:649–656. Nature Publishing Group.
- 493 Kawasaki-Nishihara, A., D. Nishihara, H. Nakamura, and H. Yamamoto. 2011. ET3/Ednrb2 signaling is critically  
494 involved in regulating melanophore migration in *Xenopus*. *Dev. Dyn.* 240:1454–1466.
- 495 Kelsh, R. N., M. L. Harris, S. Colanesi, and C. a Erickson. 2009. Stripes and belly-spots – a review of pigment cell  
496 morphogenesis in vertebrates. *Semin. Cell Dev. Biol.* 20:90–104.
- 497 Kokko, H., R. Brooks, J. M. McNamara, and A. I. Houston. 2002. The sexual selection continuum. *Proc. Biol. Sci.*  
498 269:1331–1340.
- 499 Kunte, K., W. Zhang, A. Tenger-Trolander, D. H. Palmer, A. Martin, R. D. Reed, S. P. Mullen, and M. R. Kronforst. 2014.  
500 doublesex is a mimicry supergene. *Nature* 507:229–232.
- 501 Ludwig, T., P. Fisher, S. Ganesan, and A. Efstratiadis. 2001. Tumorigenesis in mice carrying a truncating *Brca1*  
502 mutation. *Genes Dev.* 1188–1193.
- 503 MacManes, M. D. 2018. The Oyster River Protocol: a multi-assembler and kmer approach for de novo transcriptome  
504 assembly. *PeerJ* 6:e5428.
- 505 Mallet, J., and M. Joron. 1999. Evolution of diversity in warning color and mimicry: polymorphisms, shifting balance,  
506 and speciation. *Annu. Rev. Ecol. Syst.* 30:201–233.

- 507 Martin, A., R. Papa, N. J. Nadeau, R. I. Hill, B. A. Counterman, G. Halder, C. D. Jiggins, M. R. Kronforst, A. D. Long, W.  
508 O. McMillan, and R. D. Reed. 2012. Diversification of complex butterfly wing patterns by repeated regulatory  
509 evolution of a Wnt ligand. *Proc. Natl. Acad. Sci.* 109:12632–12637.
- 510 Merrill, R. M., K. K. Dasmahapatra, J. W. Davey, D. D. Dell’Aglia, J. J. Hanly, B. Huber, C. D. Jiggins, M. Joron, K. M.  
511 Kozak, V. Llaurens, S. H. Martin, S. H. Montgomery, J. Morris, N. J. Nadeau, A. L. Pinharanda, N. Rosser, M. J.  
512 Thompson, S. Vanjari, R. W. R. Wallbank, and Q. Yu. 2015. The diversification of *Heliconius* butterflies: What  
513 have we learned in 150 years? *J. Evol. Biol.* 28:1417–1438.
- 514 Mi, H., X. Huang, A. Muruganujan, H. Tang, C. Mills, D. Kang, and P. D. Thomas. 2017. PANTHER version 11: Expanded  
515 annotation data from Gene Ontology and Reactome pathways, and data analysis tool enhancements. *Nucleic  
516 Acids Res.* 45:D183–D189.
- 517 Müller, F. 1879. Ituna and Thyridia: a remarkable case of mimicry in butterflies. *Proc. Entomol. Soc. London* XX--XXIX.
- 518 Murisier, F., and F. Beermann. 2006. Genetics of pigment cells: Lessons from the tyrosinase gene family. *Histol.  
519 Histopathol.* 21:567–578.
- 520 Ng, A., R. A. Uribe, L. Yieh, R. Nuckels, and J. M. Gross. 2009. Zebrafish mutations in gart and paics identify crucial  
521 roles for de novo purine synthesis in vertebrate pigmentation and ocular development. *Development*  
522 136:2601–2611.
- 523 Nguyen, C. T., A. Langenbacher, M. Hsieh, and J. N. O. Chen. 2010. The PAF1 complex component Leo1 is essential for  
524 cardiac and neural crest development in zebrafish. *Dev. Biol.* 341:167–175. Elsevier Inc.
- 525 Passeron, T., J. C. Valencia, C. Bertolotto, T. Hoashi, E. Le Pape, K. Takahashi, R. Ballotti, and V. J. Hearing. 2007. SOX9  
526 is a key player in ultraviolet B-induced melanocyte differentiation and pigmentation.
- 527 Pimentel, H., N. L. Bray, S. Puente, P. Melsted, and L. Pachter. 2017. Differential analysis of RNA-seq incorporating  
528 quantification uncertainty. *Nat. Methods* 14:687–690.
- 529 Ponzzone, A., M. Spada, S. Ferraris, I. Dianzani, and L. De Sanctis. 2004. Dihydropteridine reductase deficiency in man:  
530 From biology to treatment. *Med. Res. Rev.* 24:127–150.

- 531 Posso-Terranova, A., and J. Andrés. 2017. Diversification and convergence of aposematic phenotypes: truncated  
532 receptors and cellular arrangements mediate rapid evolution of coloration in harlequin poison frogs. *Evolution*  
533 (N. Y). 71:2677–2692.
- 534 Rogers, R. L., L. Zhou, C. Chu, R. Marquez, A. Corl, T. Linderoth, L. Freeborn, M. D. Macmanes, Z. Xiong, J. Zheng, C.  
535 Guo, X. Xun, M. R. Kronforst, K. Summers, Y. Wu, H. Yang, C. L. Richards-Zawacki, G. Zhange, and R. Nielsen.  
536 2018. Genomic takeover by transposable elements in the Strawberry poison frog. *Mol. Biol. Evol.*
- 537 Ruxton, G. D., T. N. Sherratt, and M. P. Speed. 2004. Avoiding attack: The evolutionary ecology of crypsis, warning  
538 signals and mimicry.
- 539 Saenko, S. V., J. Teyssier, D. van der Marel, and M. C. Milinkovitch. 2013. Precise colocalization of interacting  
540 structural and pigmentary elements generates extensive color pattern variation in *Phelsuma* lizards. *BMC Biol.*  
541 11:105.
- 542 Schouwey, K., and F. Beermann. 2008. The Notch pathway: Hair graying and pigment cell homeostasis. *Histol.*  
543 *Histopathol.* 23:609–616.
- 544 Setty, S. R. G., D. Tenza, E. V. Sviderskaya, D. C. Bennett, G. Raposo, and M. S. Marks. 2008. Cell-specific ATP7A  
545 transport sustains copper-dependent tyrosinase activity in melanosomes. *Nature* 454:1142–1146.
- 546 Simão, F. A., R. M. Waterhouse, P. Ioannidis, E. V. Kriventseva, and E. M. Zdobnov. 2015. BUSCO: Assessing genome  
547 assembly and annotation completeness with single-copy orthologs. *Bioinformatics* 31:3210–3212.
- 548 Sköld, H. N., S. Aspöngren, K. L. Cheney, and M. Wallin. 2016. Fish Chromatophores-From Molecular Motors to  
549 Animal Behavior. *Int. Rev. Cell Mol. Biol.* 321:171–219. Elsevier Inc.
- 550 Smith-Unna, R., C. Bournnell, R. Patro, J. M. Hibberd, and S. Kelly. 2016. TransRate: Reference-free quality assessment  
551 of de novo transcriptome assemblies. *Genome Res.* 26:1134–1144.
- 552 Song, L., and L. Florea. 2015. Rcorrector: efficient and accurate error correction for Illumina RNA-seq reads.  
553 *Gigascience* 4:48. GigaScience.

- 554 Song, X., C. Xu, Z. Liu, Z. Yue, L. Liu, T. Yang, B. Cong, and F. Yang. 2017. Comparative transcriptome analysis of mink  
555 (*Neovison vison*) skin reveals the key genes involved in the melanogenesis of black and white coat colour. *Sci.*  
556 *Rep.* 7:1–11. Springer US.
- 557 Stuckert, Adam M M. (2018). *Dendrobates auratus* skin transcriptome [Data set]. Zenodo.  
558 <http://doi.org/10.5281/zenodo.1443579>
- 559 Summers, K., T. W. Cronin, and T. Kennedy. 2003. Variation in spectral reflectance among populations of  
560 *Dendrobates pumilio*, the strawberry poison frog, in the Bocas del Toro Archipelago, Panama. *J. Biogeogr.*  
561 30:35–53.
- 562 Sun, Y.-B., Z.-J. Xiong, X.-Y. Xiang, S.-P. Liu, W.-W. Zhou, X.-L. Tu, L. Zhong, L. Wang, D.-D. Wu, B.-L. Zhang, C.-L. Zhu,  
563 M.-M. Yang, H.-M. Chen, F. Li, L. Zhou, S.-H. Feng, C. Huang, G.-J. Zhang, D. Irwin, D. M. Hillis, R. W. Murphy, H.-  
564 M. Yang, J. Che, J. Wang, and Y.-P. Zhang. 2015. Whole-genome sequence of the Tibetan frog *Nanorana parkeri*  
565 and the comparative evolution of tetrapod genomes. *Proc. Natl. Acad. Sci.* 112:E1257–E1262.
- 566 Supple, M. a, H. M. Hines, K. K. Dasmahapatra, J. J. Lewis, D. M. Nielsen, C. Lavoie, D. a Ray, C. Salazar, W. O.  
567 Mcmillan, and B. a Counterman. 2013. Genomic architecture of adaptive color pattern divergence and  
568 convergence in *Heliconius* butterflies. *Genome Res.* 23:1248–1257.
- 569 Sychrova, H., V. Braun, and J. Souciet. 1999. Molecular cloning and sequence analysis of *Zygosaccharomyces rouxii*  
570 ADE2 gene encoding a phosphoribosyl-aminoimidazole carboxylase. *Yeast* 15:1399–1402.
- 571 Team, R. C. 2017. R Development Core Team.
- 572 Thorsteinsdottir, S., and S. K. Frost. 1986. Pigment cell differentiation: The relationship between pterin content,  
573 allopurinol treatment, and the melanoid gene in axolotls. *Cell Differ.* 19:161–172.
- 574 Tolstorukov, I. I., and B. D. Efremov. 1984. Genetic mapping of the yeast *Pichia pinus* Mapping by the tetrad analysis.  
575 *Genetika* 20:1099–1107.
- 576 Tonks, I. D., G. J. Walker, A. W. Mould, B. Ferguson, P. Keith, N. K. Hayward, and G. F. Kay. 2012. Brca1 is involved in  
577 establishing murine pigmentation in a p53 and developmentally specific manner. *Pigment Cell Melanoma Res.*

- 578 25:530–532.
- 579 Vestergaard, J. S., E. Twomey, R. Larsen, K. Summers, and R. Nielsen. 2015. Number of genes controlling a  
580 quantitative trait in a hybrid zone of the aposematic frog *Ranitomeya imitator*. *Proc. R. Soc. B* 282:20141950.
- 581 Videira, I. F. D. S., D. F. L. Moura, and S. Magina. 2013. Mechanisms regulating melanogenesis. *An. Bras. Dermatol.*  
582 88:76–83.
- 583 Wolnicka-Glubisz, A., A. Pecio, D. Podkowa, L. M. Kolodziejczyk, and P. M. Plonka. 2012. Pheomelanin in the skin of  
584 *Hymenochirus boettgeri* (Amphibia: Anura: Pipidae). *Exp. Dermatol.* 21:537–540.
- 585 Wu, X. S., J. A. Martina, and J. A. Hammer. 2012. Melanoregulin is stably targeted to the melanosome membrane by  
586 palmitoylation. *Biochem. Biophys. Res. Commun.* 426:209–214. Elsevier Inc.
- 587 Yaar, M., C. Wu, H. Y. Park, I. Panova, G. Schutz, and B. A. Gilchrist. 2006. Bone morphogenetic protein-4, a novel  
588 modulator of melanogenesis. *J. Biol. Chem.* 281:25307–25314.
- 589 Ziegler, I. 2003. The pteridine pathway in zebrafish: Regulation and specification during the determination of neural  
590 crest cell-fate. *Pigment Cell Res.* 16:172–182.
- 591
